# Supplementary material for: Two-phase interface hydrothermal synthesis of binder-free SnS2/graphene flexible paper electrodes for high-performance Li-ion batteries
Source: Royal Society of Chemistry journal article supplement (doi:10.1039/c9ra03397a), 2019-01-01
Supplement: c9ra03397a1.pdf [file c9ra03397a1.pdf]

## **Supporting Information**

### **Two-phase interface hydrothermal synthesis of binder-free SnS<sub>2</sub>/graphene flexible paper electrodes for high-performance Li-ion batteries**

**Hao Wen, Wenbin Kang, Xingang Liu, Wenjuan Li, Liping Zhang and Chuhong  
Zhang★**

State Key Laboratory of Polymer Materials Engineering, Polymer Research Institute,  
Sichuan University, No. 24, South Section 1, Yihuan Road, Chengdu 610065, China.

★To whom correspondence should be addressed.

E-mail: [chuhong.zhang@scu.edu.cn](mailto:chuhong.zhang@scu.edu.cn)

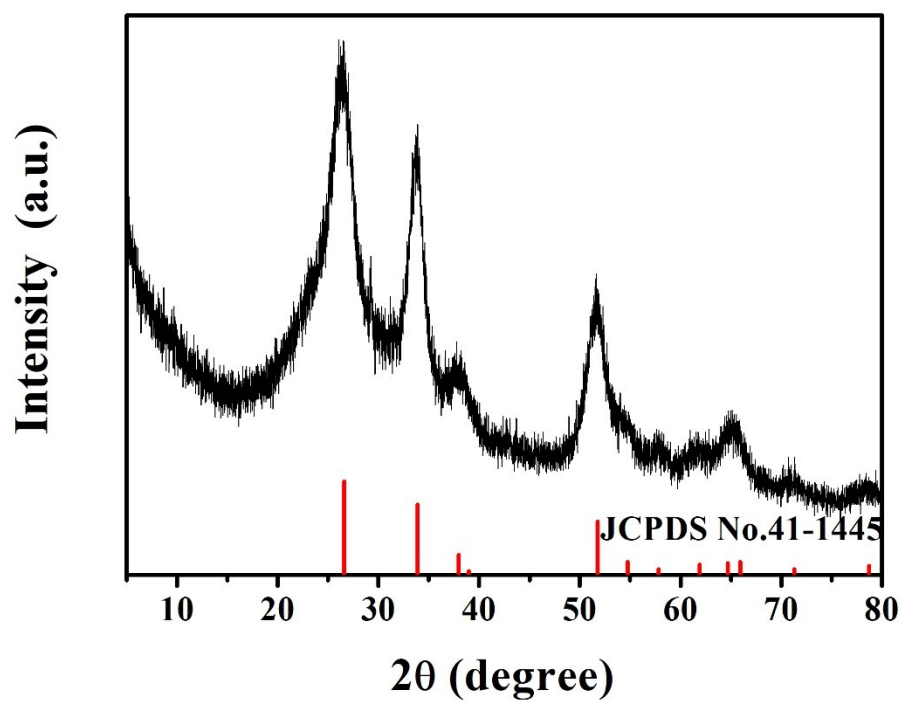

**Figure S1.** XRD pattern of the  $\text{SnS}_2$ /graphene oxide composite paper subjected to a hydrothermal process at the solid/gas interface with de-ionized water as a reducing agent.

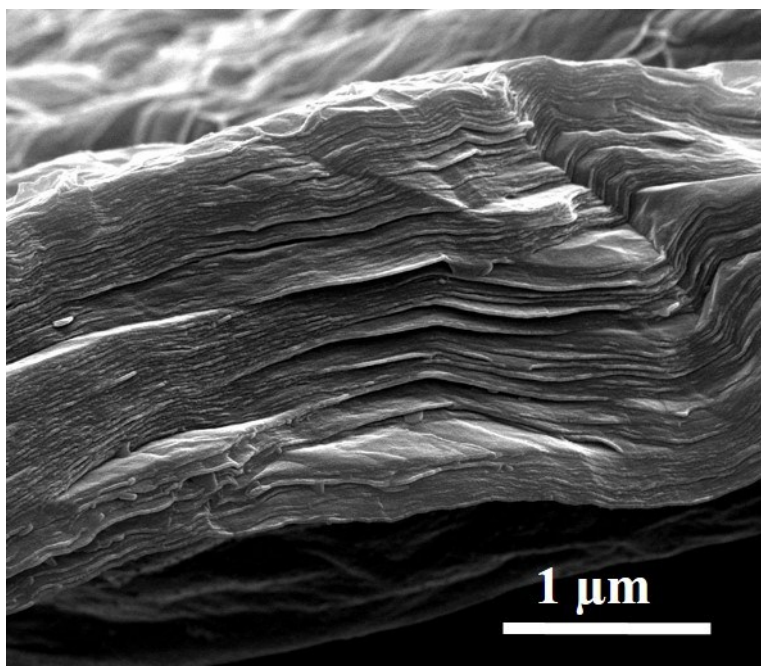

**Figure S2.** Cross-section view SEM image of the graphene paper.

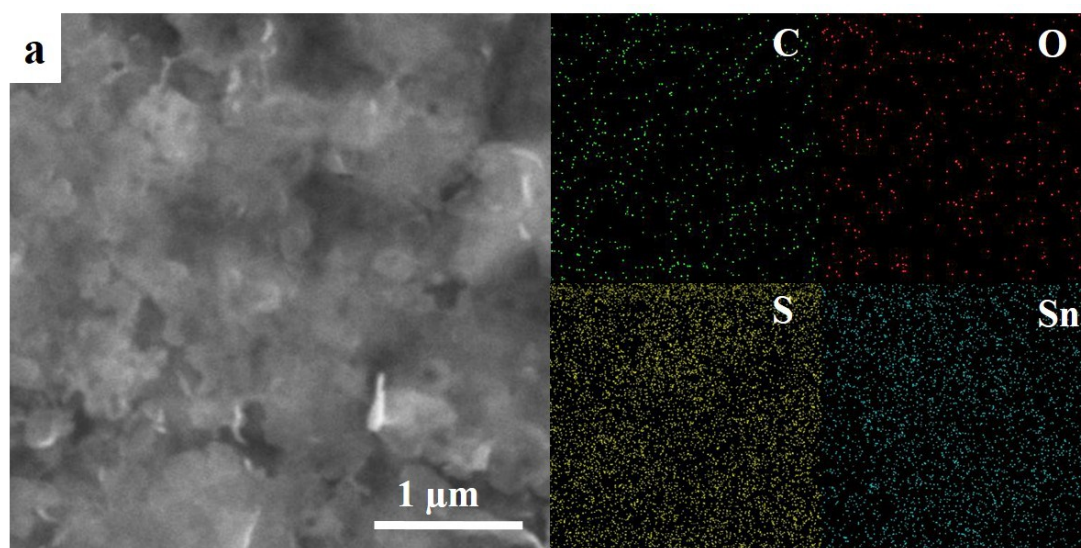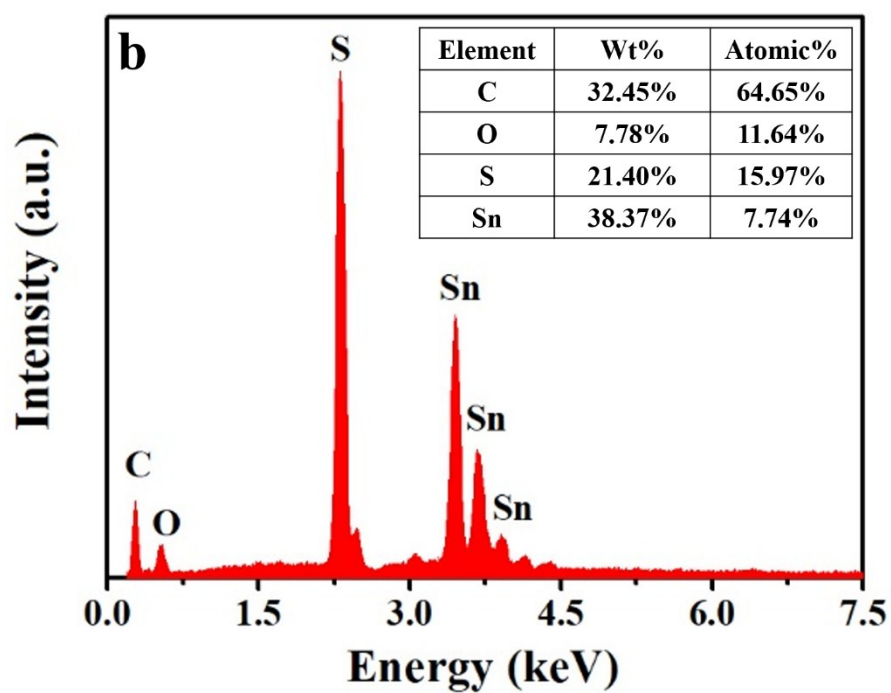

**Figure S3.** a) SEM image of the SGP with corresponding EDX mapping images; b) EDX spectrum of the SGP.

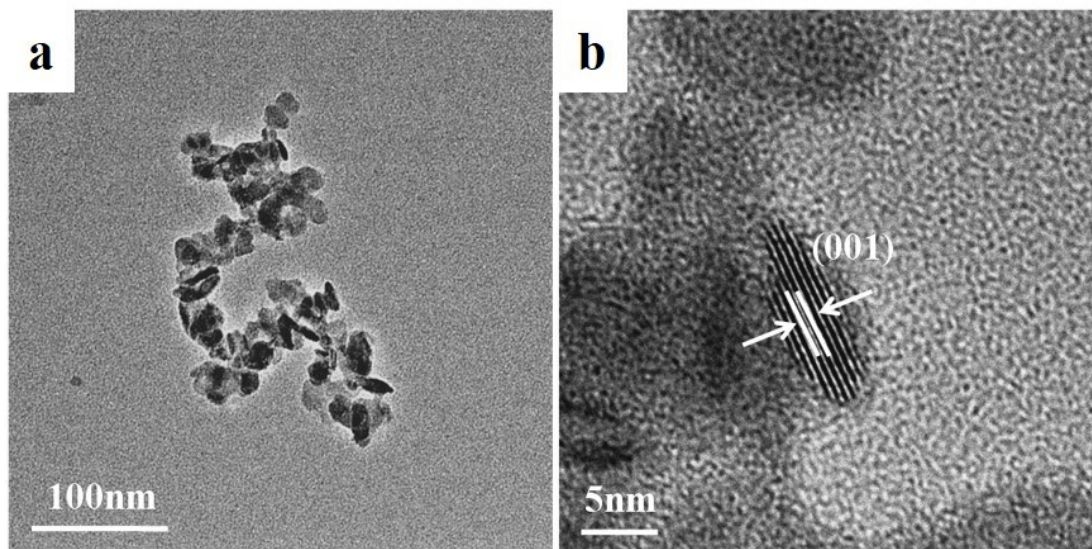

**Figure S4.** a) TEM and b) HRTEM images of the pristine SnS<sub>2</sub> nanocrystals.

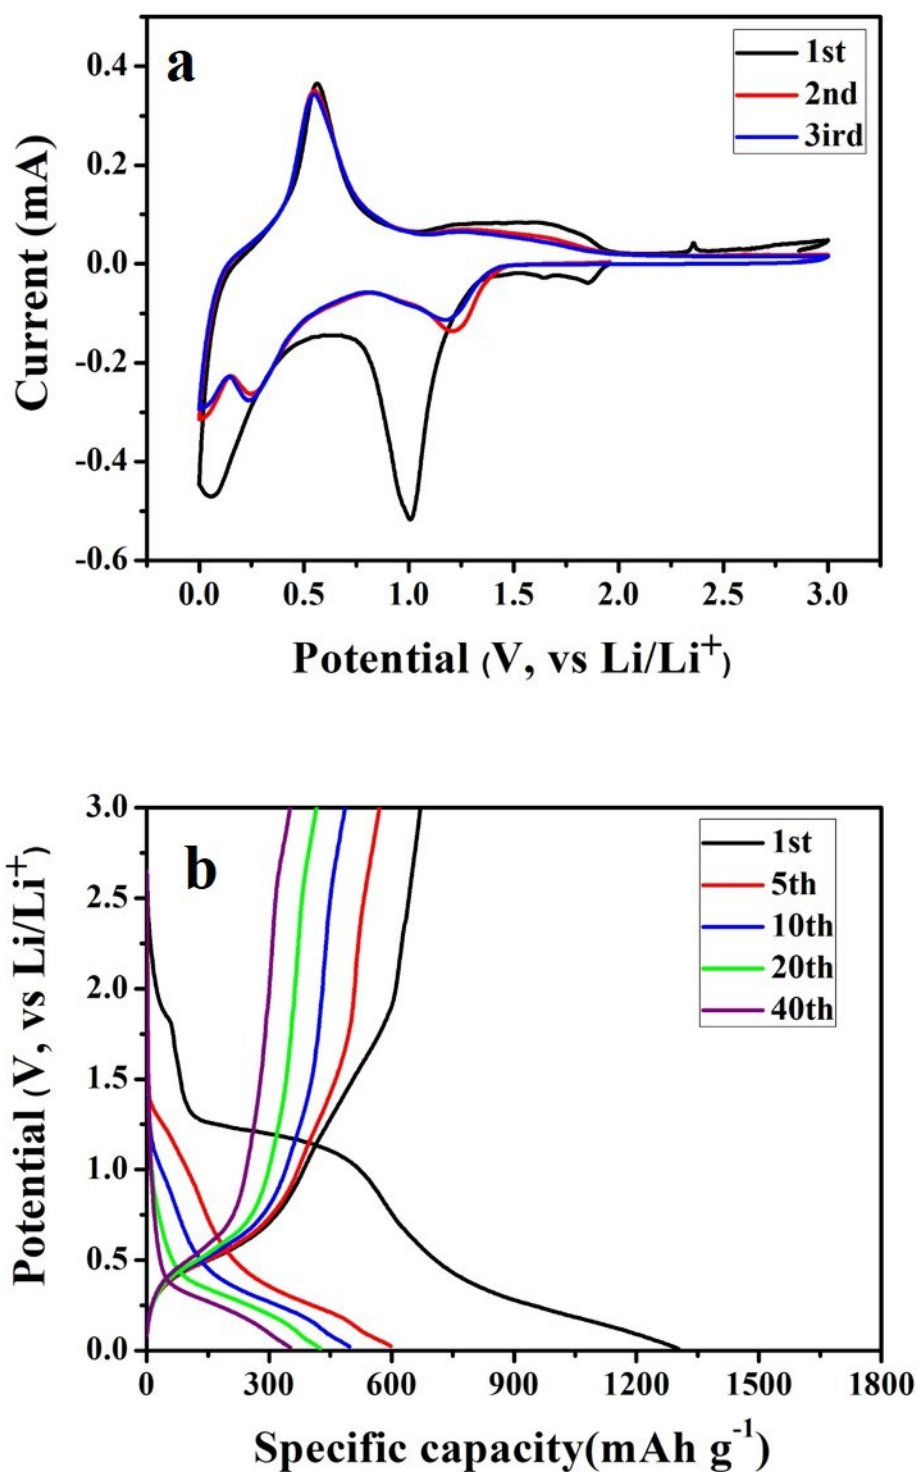

**Figure S5.** a) Cyclic voltammograms of the pristine  $\text{SnS}_2$  measured at a scan rate of  $0.1 \text{ mV s}^{-1}$ ; b) Galvanostatic charge-discharge profiles of the pristine  $\text{SnS}_2$  measured at a current density of  $100 \text{ mA g}^{-1}$  in the voltage range of 0.01 to 3.0 V (vs.  $\text{Li/Li}^+$ ).



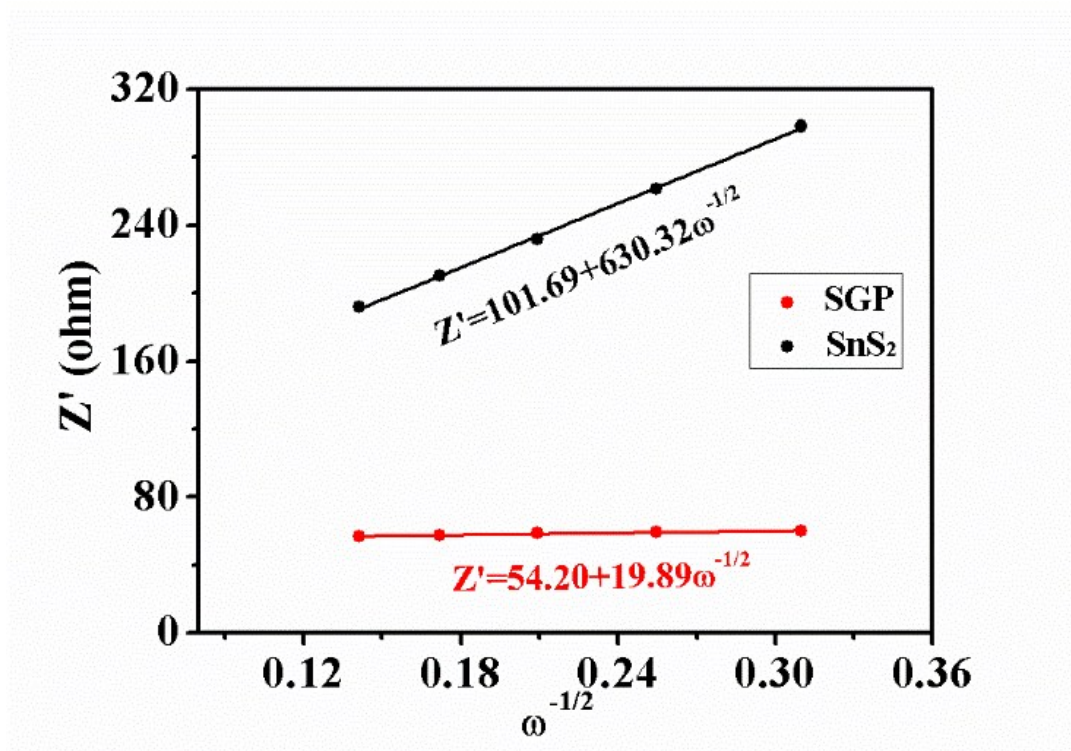

**Figure S6.**  $Z'$  as a function of the  $\omega^{-1/2}$  plot in the low frequency region of the SGP and pristine  $\text{SnS}_2$  nanocrystals electrodes (the slope of fitting curves is the Warburg factor,  $\sigma$ ).

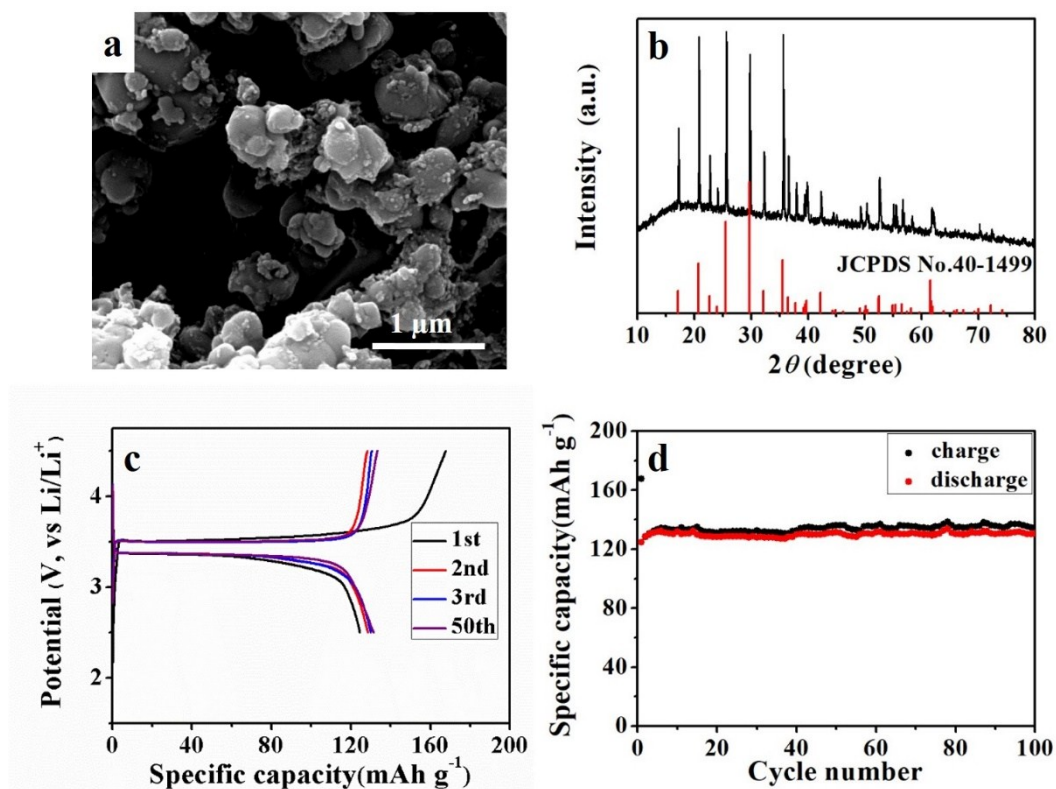

**Figure S7.** a) SEM image and b) XRD pattern of the commercial  $\text{LiFePO}_4$ ; c) The galvanostatic charge-discharge curves, and cyclic performance of the  $\text{LiFePO}_4$  half cell, measured at a current density of  $100\ \text{mA g}^{-1}$  in the voltage range of 2.5 to 4.5 V (vs.  $\text{Li/Li}^+$ ).



**Table S1.** Values of the equivalent circuit elements used to fit the experimental data

|                       | Before cycling            |        | After 10 cycles           |       |
|-----------------------|---------------------------|--------|---------------------------|-------|
|                       | Pristine SnS <sub>2</sub> | SGP    | Pristine SnS <sub>2</sub> | SGP   |
| R <sub>e</sub> /Ω     | 6.78                      | 2.02   | 6.05                      | 1.66  |
| R <sub>s</sub> /Ω     | 195.69                    | 139.2  | 141.7                     | 50.38 |
| R <sub>ct</sub> /Ω    | 2.3                       | 1.94   | 2.1                       | 0.28  |
| R <sub>total</sub> /Ω | 204.77                    | 143.16 | 149.85                    | 50.38 |
